# Supplementary material
Source: publisher figshare collection journal article supplement (https://acs.figshare.com/ndownloader/files/3773971)
Supplement: Supplementary file 1 [file 3773971]

## **Supporting Information**

### **An Effective Top-down LC/MS+ Method for Assessing Actin Isoforms as a Potential Cardiac Disease Marker**

Yi-Chen Chen<sup>1,2,⊥</sup>, Serife Ayaz-Guner<sup>1,⊥</sup>, Ying Peng<sup>1,3</sup>, Nicole M. Lane<sup>1</sup>, Matthew R.  
Locher<sup>4</sup>, Takushi Kohmoto<sup>4</sup>, Lars Larsson<sup>5</sup>, Richard L. Moss<sup>1,3</sup>, Ying Ge<sup>1,2,3</sup>

<sup>1</sup>Department of Cell and Regenerative Biology, <sup>2</sup>Department of Chemistry, <sup>3</sup>Human Proteomics Program, <sup>4</sup>Department of Surgery, School of Medicine and Public Health, University of Wisconsin-Madison, Madison, Wisconsin, USA, <sup>5</sup>Department of Physiology and Pharmacology, Department of Clinical Neuroscience, Karolinska Institutet, Stockholm, Sweden

\*To whom correspondence may be addressed: Ying Ge, Ph.D., 1300 University Ave., SMI 130, Madison, WI, 53706. E-mail: ge2@wisc.edu; Tel: 608-263-9212; Fax: 608-265-5512.

<sup>⊥</sup>These two authors contributed equally.

## Supplementary Tables

**Supplementary Table 1. Investigation of the impact of the number of isotopomers on the quantification of relative abundances.** The calculation is based on three MS spectra of  $\alpha$ -actin isolated from swine hearts (Figure 5).

| # of isotopomer | $\alpha$ CAA% | $\alpha$ SKA% |
|-----------------|---------------|---------------|
| 3               | 37.1          | 62.9          |
| 5               | 37.0          | 63.0          |
| 7               | 37.2          | 62.8          |
| 11              | 37.2          | 62.8          |

**Supplementary Table 2. Individual values of relative abundances of  $\alpha$ CAA and  $\alpha$ SKA from each human heart.** The calculated values are based on the data presented in Figure 6. Three biological replicates in control (Ctrl), Ctrl-1, Ctrl-2, Ctrl-3, and dilated cardiomyopathy (DCM), DCM-1, DCM-2, DCM-3, respectively.

| Samples | $\alpha$ CAA % | $\alpha$ SKA % |
|---------|----------------|----------------|
| Ctrl1   | 73.3           | 26.7           |
| Ctrl2   | 75.6           | 24.4           |
| Ctrl 3  | 87.4           | 12.6           |
| DCM 1   | 57.0           | 43.0           |
| DCM 2   | 58.2           | 41.8           |
| DCM 3   | 53.5           | 46.5           |

## Supplementary Figures

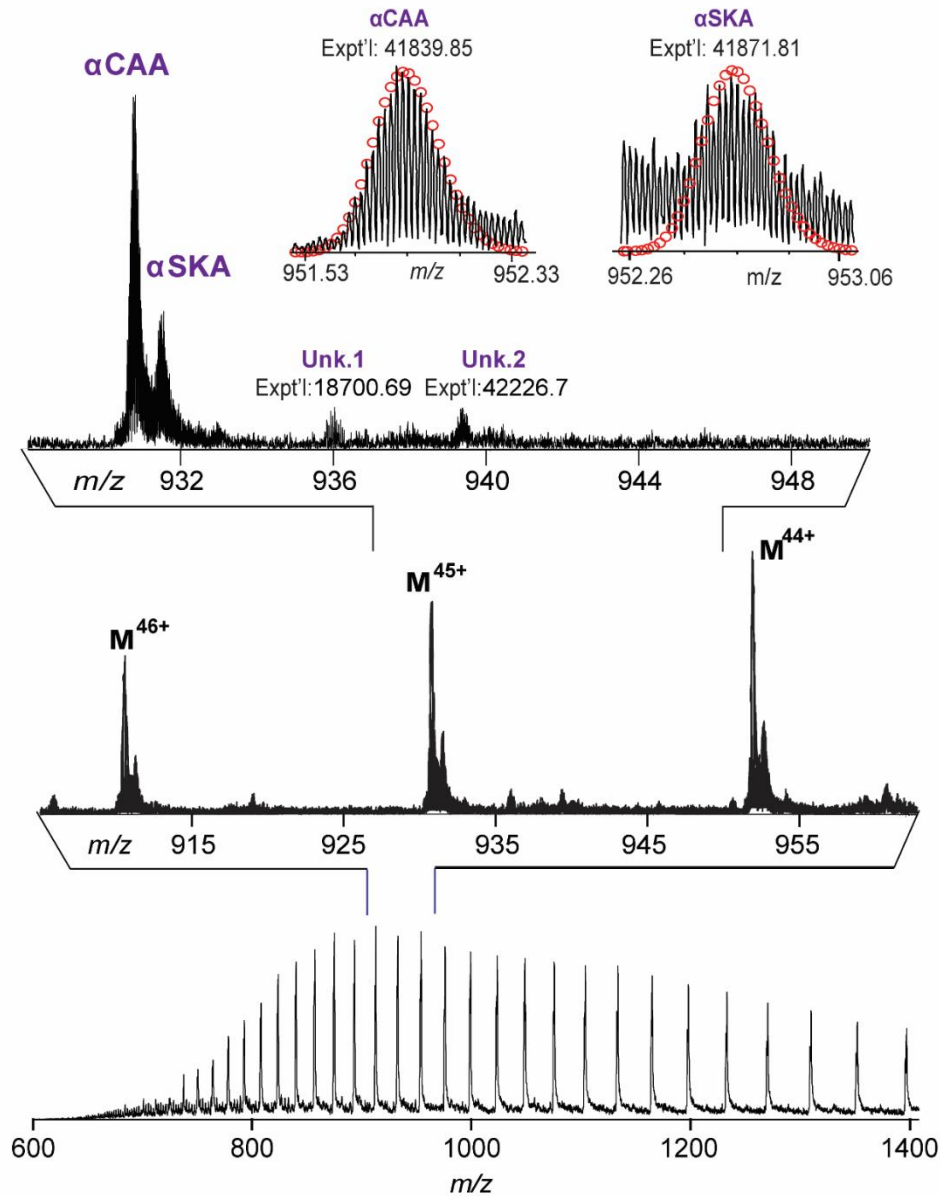

**Supplementary Figure 1. LC/MS<sup>+</sup> analysis of human  $\alpha$ -actin.** Bottom; MS detection of human  $\alpha$ -actin in on-line LC/MS using low-resolution MS (shown in multiply charged ions); middle, off-line FTMS analysis of intact  $\alpha$ -actin ( $M^{46+}$ ,  $M^{45+}$ ,  $M^{44+}$ ); and top, isotopically resolved molecular ions  $\alpha$ CAA and  $\alpha$ SKA with two unknown proteins. Circles represent the theoretical isotopic abundance distribution of the isotopomer peaks corresponding to the assigned mass.

```

P68032|ACTC MCDDEETALVCDNGSGLVKAGFAGDDAPRAVFPSIVGRPRHQGMVGMGQKDSYVGDEA 60
P68133|ACTS MCDDEETALVCDNGSGLVKAGFAGDDAPRAVFPSIVGRPRHQGMVGMGQKDSYVGDEA 60
***:*****
P68032|ACTC QSKRGILTLKYPIEHGIITNWDDMEKIWHHTFYNELRVAPEEHPTLLTEAPLNPKANREK 120
P68133|ACTS QSKRGILTLKYPIEHGIITNWDDMEKIWHHTFYNELRVAPEEHPTLLTEAPLNPKANREK 120
*****
P68032|ACTC MTQIMFETFNPAMYVAIQAVLSLYASGRTTGIVLDSGDGVTHNVPIYEGYALPHAIMRL 180
P68133|ACTS MTQIMFETFNPAMYVAIQAVLSLYASGRTTGIVLDSGDGVTHNVPIYEGYALPHAIMRL 180
*****
P68032|ACTC DLAGRDLTDYLMKILTERGYSFVTTAEREIVRDIKEKLCYVALDFENEMATAASSSSLEK 240
P68133|ACTS DLAGRDLTDYLMKILTERGYSFVTTAEREIVRDIKEKLCYVALDFENEMATAASSSSLEK 240
*****
P68032|ACTC SYELPDGQVITIGNERFRCPETLFQPSFIGMESAGIHETTYSIMKCDIDIRKDLYANNV 300
P68133|ACTS SYELPDGQVITIGNERFRCPETLFQPSFIGMESAGIHETTYSIMKCDIDIRKDLYANNV 300
*****
P68032|ACTC LSGGTTMYPGIADRMQKEITALAPSTMKIKIIAPPERKYSVWIGGSILASLSTFQQMWIS 360
P68133|ACTS MSGGTTMYPGIADRMQKEITALAPSTMKIKIIAPPERKYSVWIGGSILASLSTFQQMWIT 360
:*****:
P68032|ACTC KQEYDEAGPSIVHRKCF 377
P68133|ACTS KQEYDEAGPSIVHRKCF 377
*****

```

**Supplementary Figure 2. The sequence alignment of human  $\alpha$ -cardiac actin ( $\alpha$ CAA) and  $\alpha$ -skeletal actin ( $\alpha$ SKA).** The sequence alignment of human  $\alpha$ CAA (P68032), and  $\alpha$ SKA (P68133) from UnitProtKB/Swiss-Prot database. Human  $\alpha$ CAA and  $\alpha$ SKA vary by two juxtaposed amino acids (Asp2Glu3 for  $\alpha$ CAA, and Glu2Asp3 for  $\alpha$ SKA) and two amino acids substitution (Met299 and Thr358 in  $\alpha$ SKA, versus Leu299 and Ser358 in  $\alpha$ CAA), resulting in 32 Da difference. The two juxtaposed amino acids and the two amino acids substitution are both indicated in red.

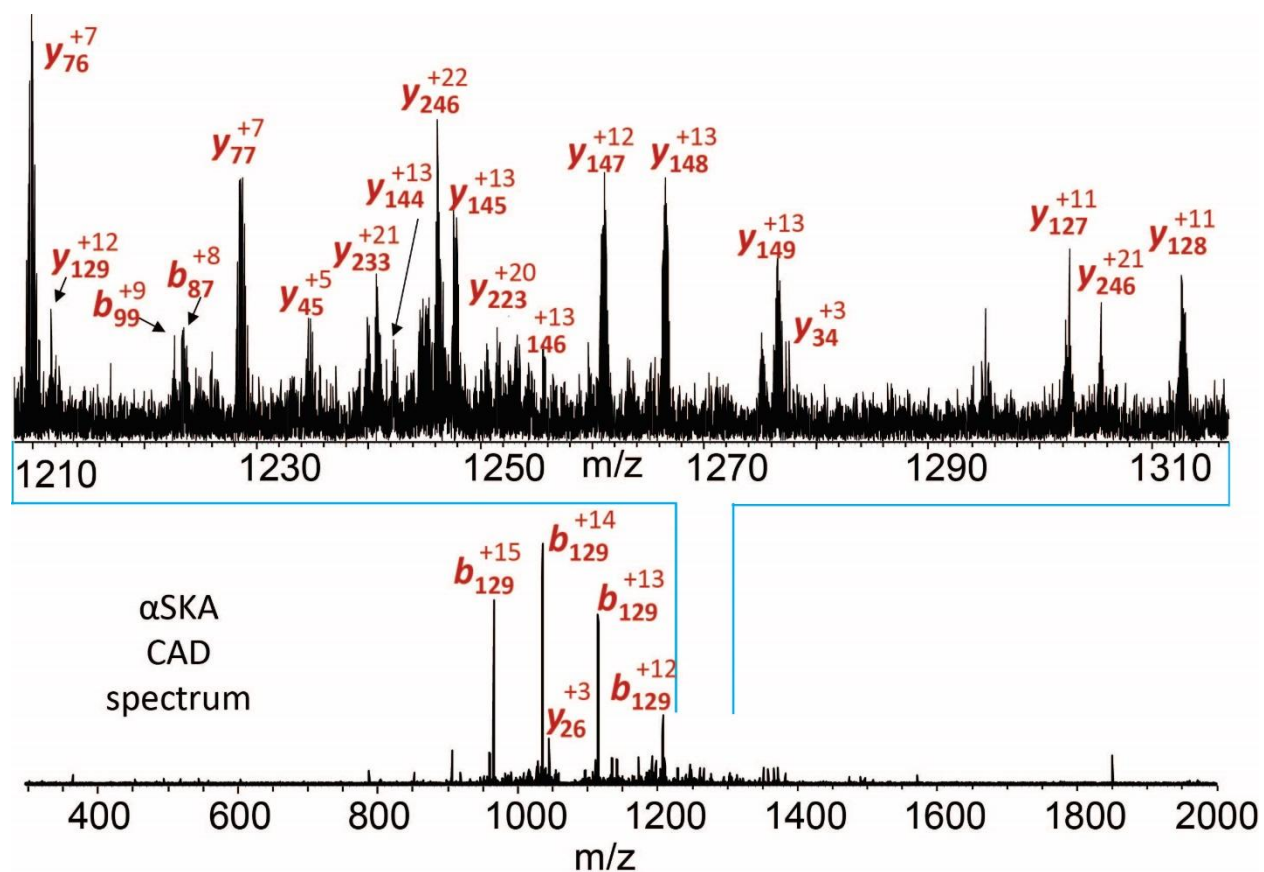

**Supplementary Figure 3.** MS/MS mapping of  $\alpha$ SKA. Representative MS/MS spectra of  $b$  and  $y$  ions from CAD spectra of  $\alpha$ SKA.

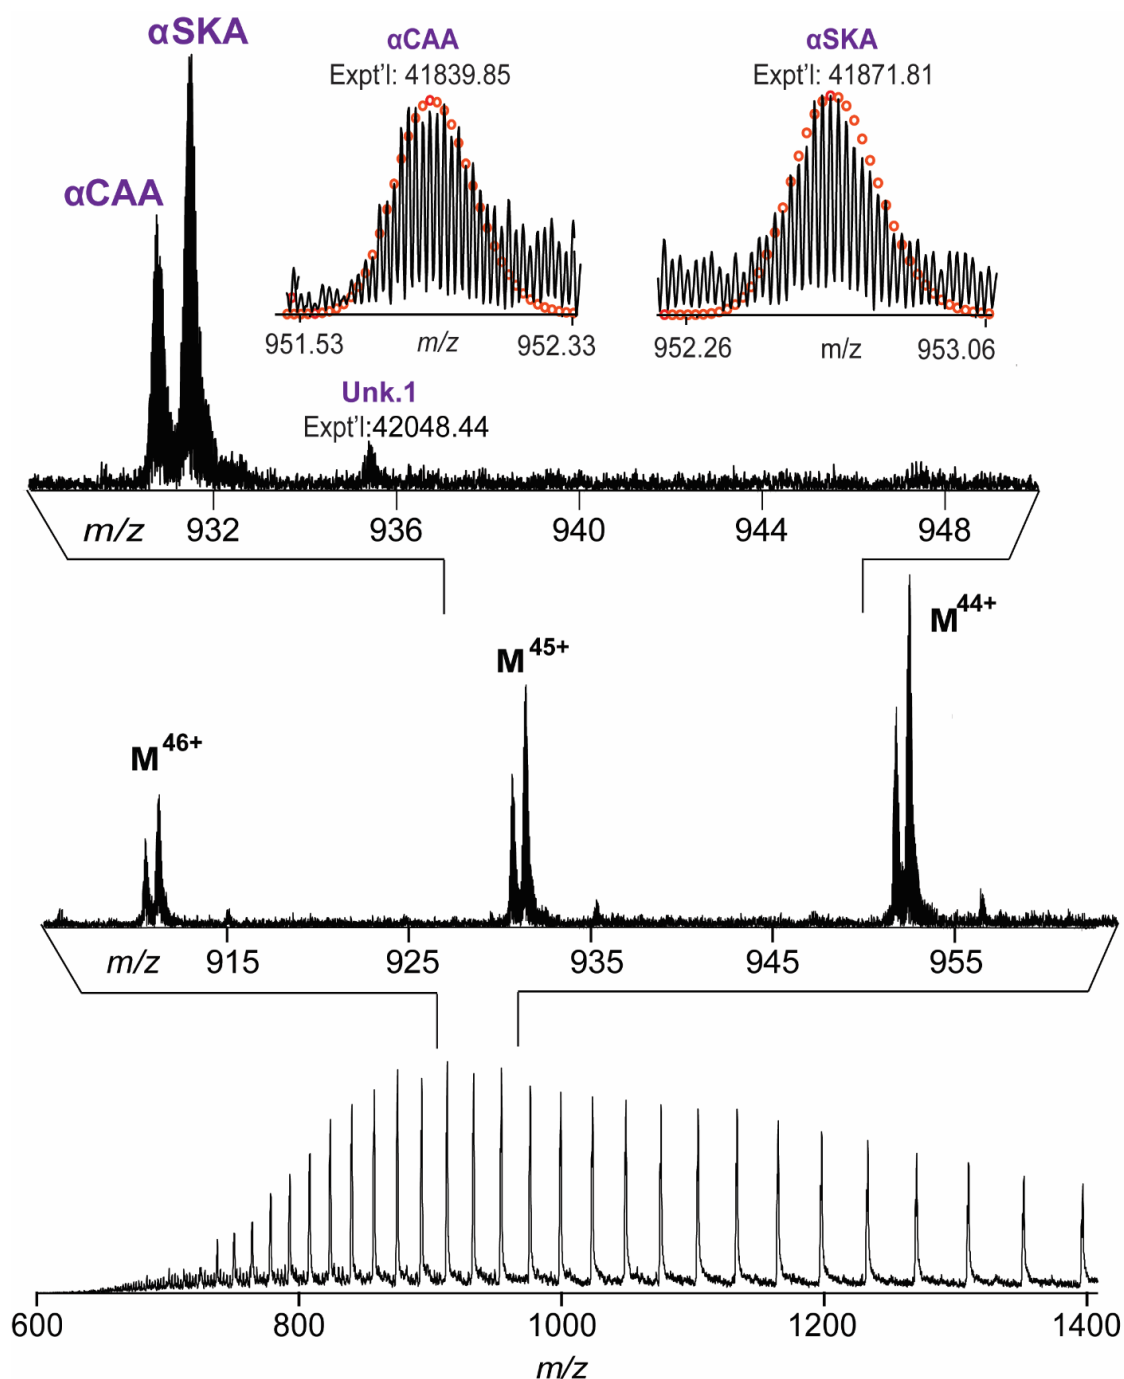

**Supplementary Figure 4. LC/MS+ analysis of swine  $\alpha$ -actin.** Bottom; MS detection of swine  $\alpha$ -actin proteins in on-line LC/MS using low-resolution MS (shown in multiply charged ions); middle, off-line FT analysis of intact  $\alpha$ -actin ( $M^{46+}$ ,  $M^{45+}$ ,  $M^{44+}$ ); and top, isotopically resolved molecular ions  $\alpha$ CAA and  $\alpha$ SKA with one unknown protein. Circles represent the theoretical isotopic abundance distribution of the isotopomer peaks corresponding to the assigned mass.
